# Supplementary material
Source: bioRxiv or medRxiv preprint supplement (https://medrxiv.org/highwire/filestream/68145/field_highwire_adjunct_files/3/19000430-4.pdf)

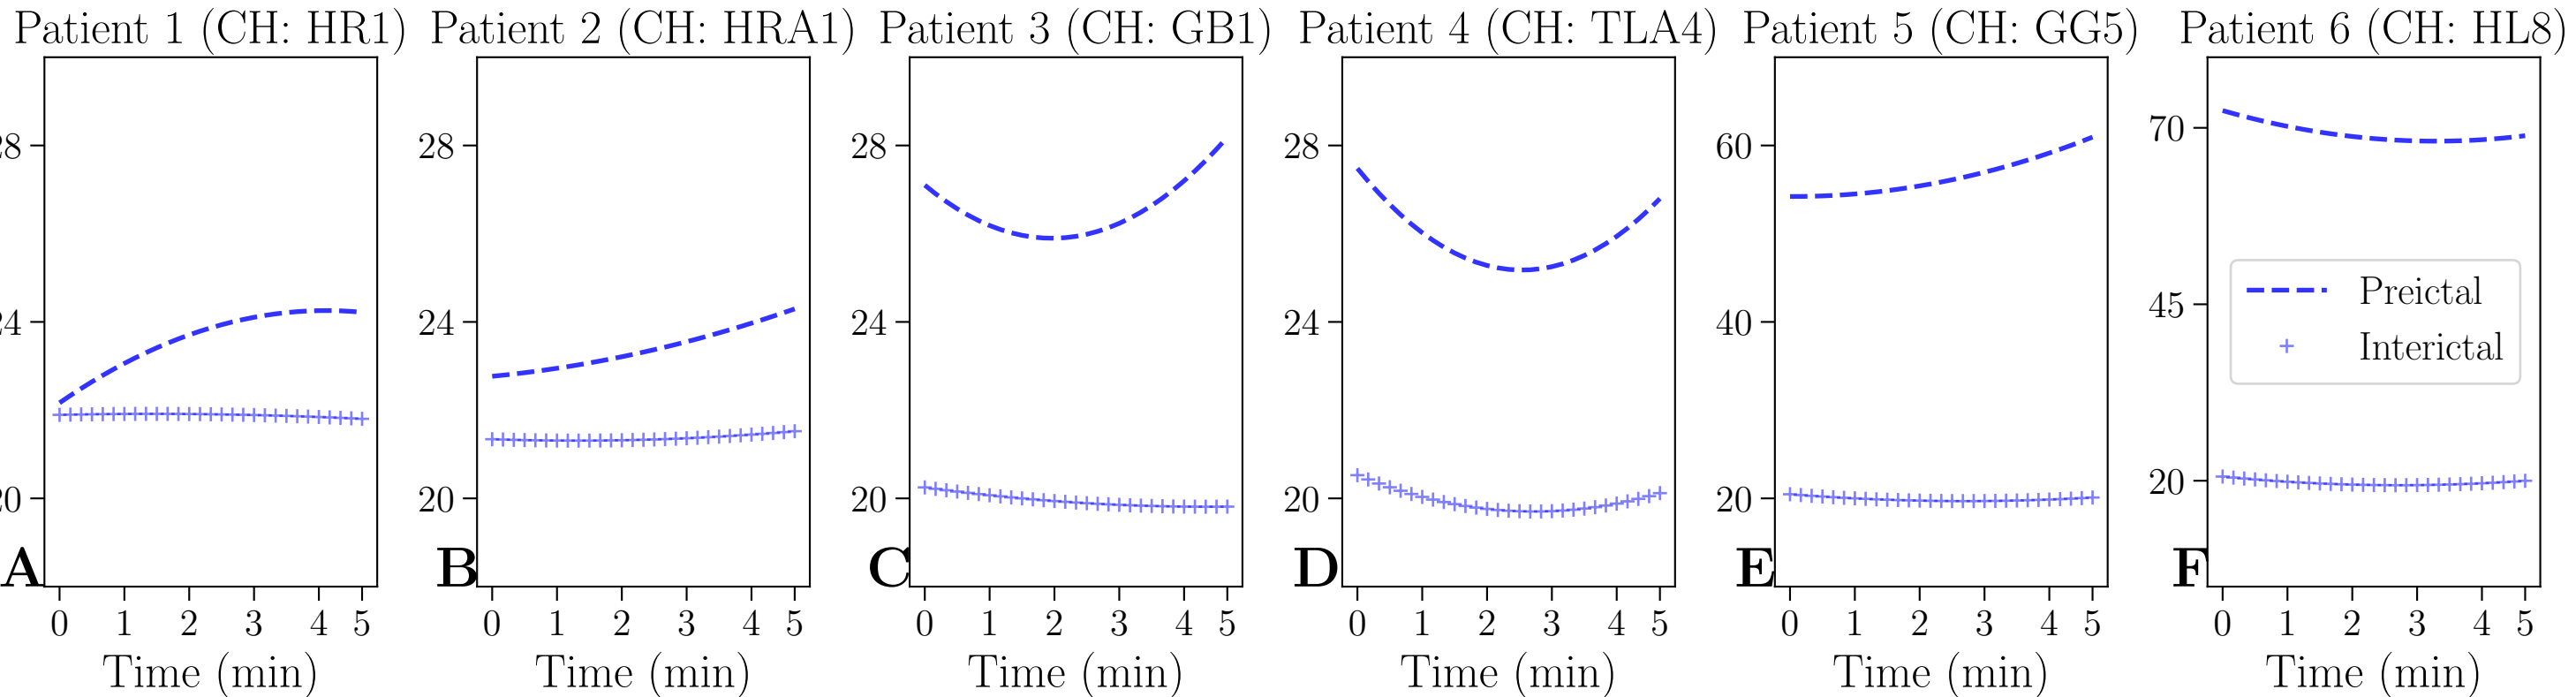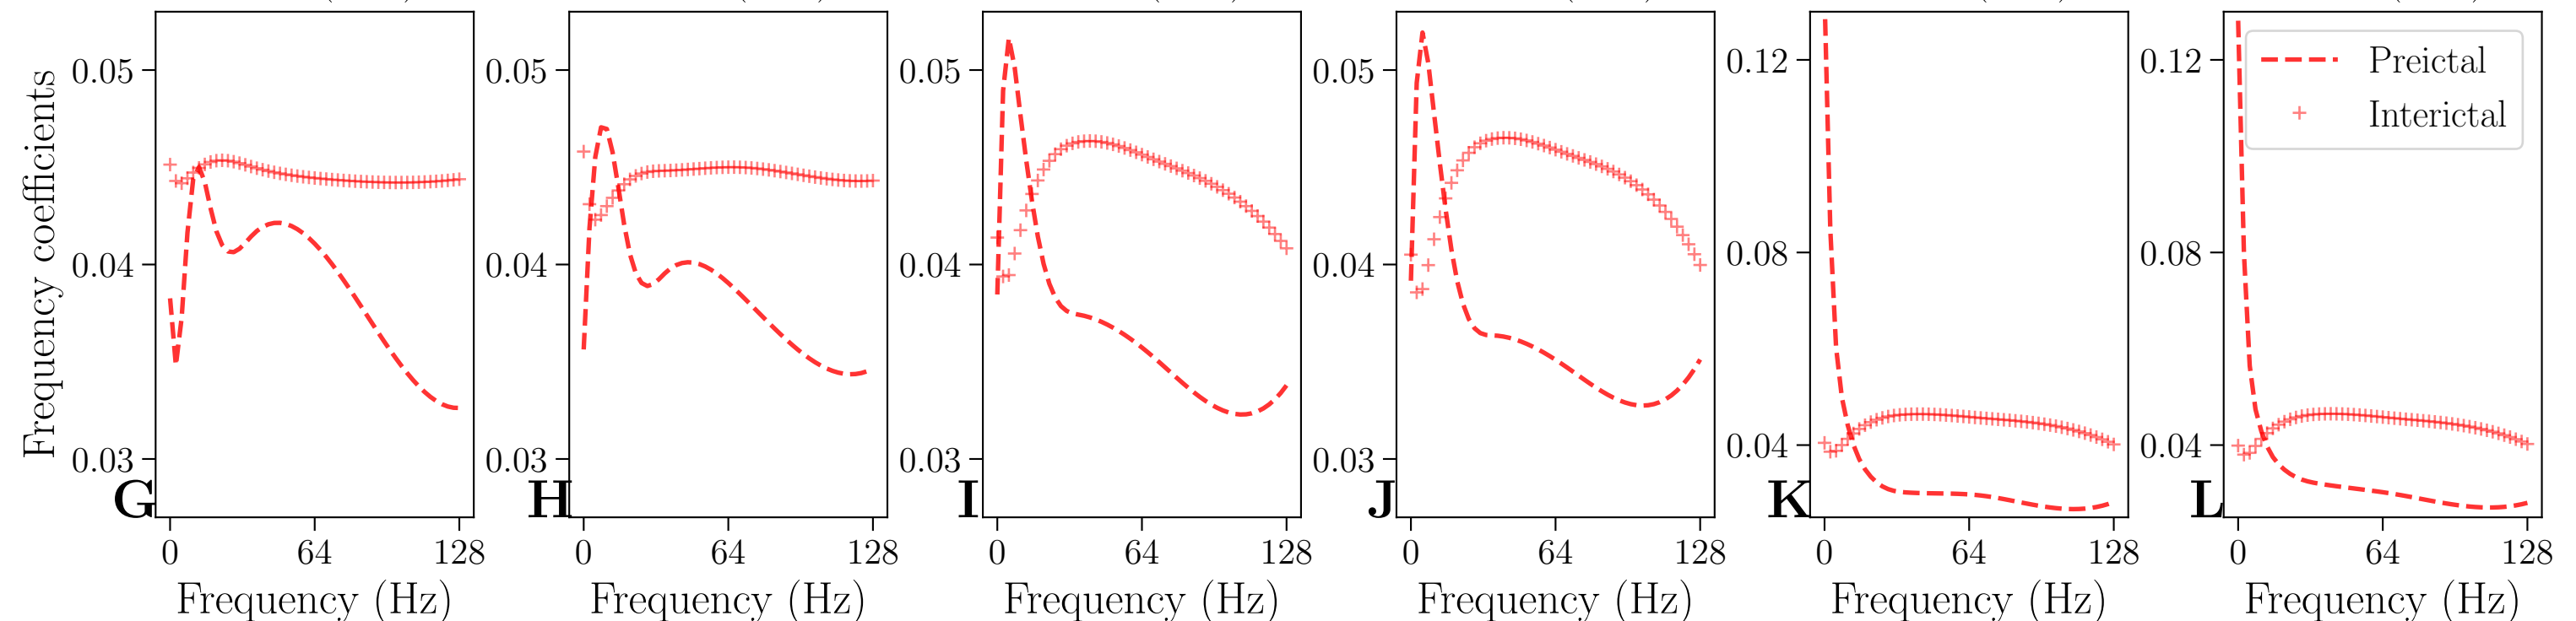

Supplement: Supplementary file [file 19000430-4.pdf]
